# Supplementary material for: Calcium and Boron Fertilization Improves Soybean Photosynthetic Efficiency and Grain Yield
Source: MDPI journal article supplement (doi:10.3390/plants11212937), 2022-11-01
Supplement: s1 [file s1]

Calcium and Boron Fertilization Improves Soybean Photosynthetic Efficiency  
and Grain Yield

SUPPLEMENTARY MATERIAL

Tables

**Table S1.** Physicochemical attributes (0.0 -0.2 m depth) before sowing.

| Sand                  |                            | Clay                   |                            | Silt             |                  | Soil texture |      | Soil density         |
|-----------------------|----------------------------|------------------------|----------------------------|------------------|------------------|--------------|------|----------------------|
|                       |                            | (g kg <sup>-1</sup> )  |                            |                  |                  |              |      | (gcm <sup>-3</sup> ) |
| 117.0                 |                            | 602.0                  |                            | 281.0            |                  | Clay         |      | 1.19                 |
| pH                    | MO                         | resina P               | K <sup>+</sup>             | Ca <sup>2+</sup> | Mg <sup>2+</sup> | SB           | CTC  | SB                   |
| (CaCl <sub>2</sub> )  | (g kg <sup>-1</sup> )      | (mg kg <sup>-1</sup> ) | (mmol c kg <sup>-1</sup> ) |                  |                  |              |      | %                    |
| 5.4                   | 26.2                       | 29.0                   | 3.9                        | 25.0             | 15.0             | 43.9         | 86.0 | 51.0                 |
| S                     | Al <sup>3+</sup>           | H+Al                   | Fe                         | Cu               | Mn               | Zn           | B    |                      |
| (g kg <sup>-1</sup> ) | (mmol c kg <sup>-1</sup> ) |                        | (mg kg <sup>-1</sup> )     |                  |                  |              |      |                      |
| 4.9                   | 2.0                        | 42.0                   | 22.0                       | 8.8              | 26.2             | 2.0          | 0.4  |                      |

**Table S2.** Nitrogen (N), Phosphorus (P), Potassium (K), Calcium (Ca), Magnesium (Mg), Sulfur (S), Boron (B), Copper (Cu), Zinc (Zn), Leaf Protein, Total Soluble sugar (TS), plant height (PH), number of pods per plant (NPP), number of pods per grain (NGPod), number of grains per plant (NGP), 100 grains weight (W100G) and grain yield (GY) as affected by cropping cycles and Ca + B foliar application.

| Treatments           | N                   | P      | K      | Ca     | Mg     | S       | B      | Cu     | Zn     |
|----------------------|---------------------|--------|--------|--------|--------|---------|--------|--------|--------|
|                      | g kg <sup>-1</sup>  |        |        |        |        |         |        |        |        |
| 2019/2020            | 40.3 b              | 3.1 a  | 16,9 b | 16,0 a | 3,3 b  | 2,1 a   | 48,5 b | 12,1 a | 46,9 a |
| 2020/2021            | 42.0 a              | 3.0 a  | 22,4 a | 14,6 b | 3,5 a  | 2,1 a   | 50,9 a | 10,3 b | 42,5 b |
| <i>F probability</i> |                     |        |        |        |        |         |        |        |        |
| Treatment (T)        | 0.252               | 0.350  | 0.428  | 0.611  | 0.215  | 0.017   | <0,001 | 0.185  | 0.070  |
| Years (Y)            | 0.003               | 0.210  | <0,001 | <0,001 | 0.002  | 0.468   | 0.004  | 0.006  | <0,001 |
| T × Y                | 0.739               | 0.455  | 0.009  | 0.299  | 0.817  | 0.141   | 0.624  | 0.249  | 0.755  |
| Treatments           | Protein             | TS     | PH     | NPP    | NGPod  | NGP     | W100G  | GY     |        |
|                      | mg kg <sup>-1</sup> |        |        |        |        |         |        |        |        |
| 2019/2020            | 90.0 a              | 72.4 a | 71.1 b | 48.6 b | 1.9 b  | 92.3 b  | 15.3 b | 3.3 b  |        |
| 2020/2021            | 93.4 a              | 59.2 b | 97.7 a | 58.1 a | 2.0 a  | 118.6 a | 18.2 a | 4.8 a  |        |
| <i>F probability</i> |                     |        |        |        |        |         |        |        |        |
| Treatment (T)        | 0.000               | <0,001 | 0.938  | <0,001 | 0.073  | <0,001  | 0.003  | <0,001 |        |
| Years (Y)            | 0.152               | <0,001 | <0,001 | <0,001 | <0,001 | <0,001  | <0,001 | <0,001 |        |
| T × Y                | 0.814               | 0.054  | 0.910  | 0.892  | 0.478  | 0.360   | 0.129  | 0.348  |        |

\* Means followed by the same letters in the columns do not differ significantly by Fisher's test (p≤0,05).

**Figure**

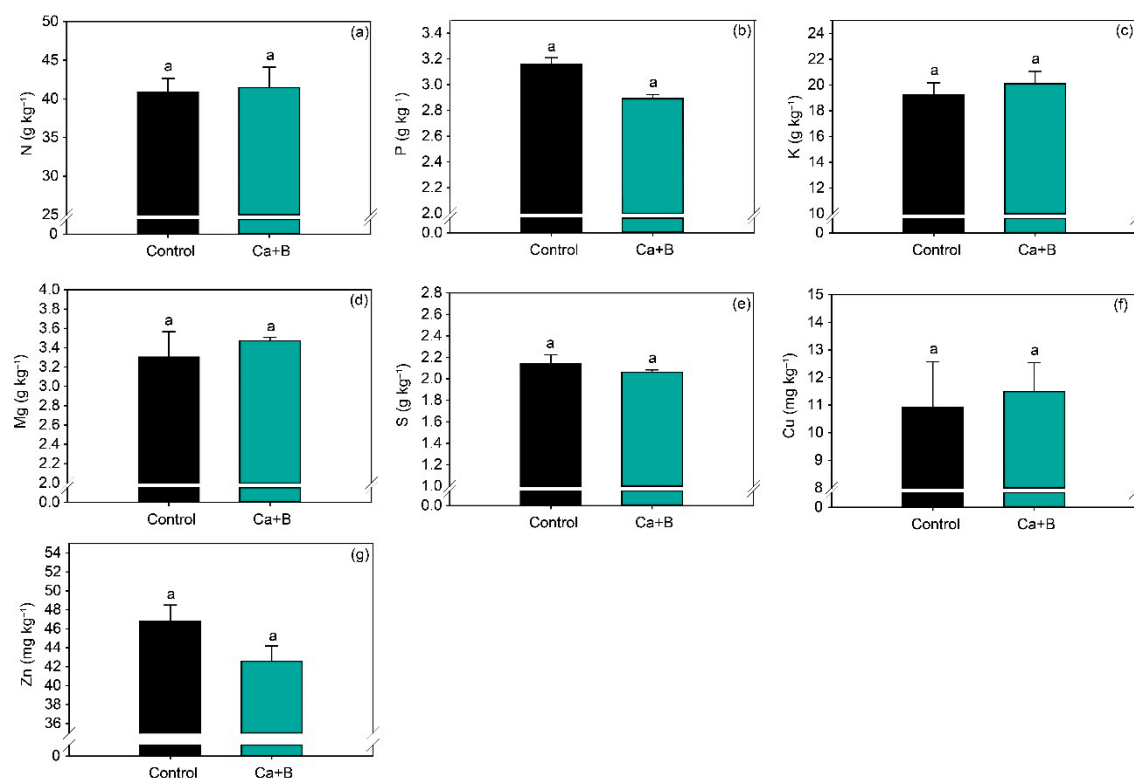

**Figure S1.** Foliar contents of N (a), P (b), K (c), Mg (d), S (e), Cu (f) and Zn (g) in soybean as function of foliar application of Calcium (Ca) plus Boron (B). Different lowercase letters indicate a significant difference between treatments (presence or absence of Ca + B) by Fisher's test ( $p \leq 0.05$ ).
